# Supplementary material for: The nature of NO-bonding in N-oxide group
Source: Royal Society of Chemistry journal article supplement (doi:10.1039/c5cp02148k), 2015-01-01
Supplement: c5cp02148k1.pdf [file c5cp02148k1.pdf]

# On the nature of NO-bonding in *N*-oxide group

*by*

*AUTHOR NAMES:*

*Marlena Łukomska †, Agnieszka J. Rybarczyk-Pirek †, Mirosław Jabłoński ‡, Marcin Palusiak †\**

*AUTHOR ADDRESS:*

† Department of Theoretical and Structural Chemistry, Faculty of Chemistry, University of Łódź,  
163/165 Pomorska St., 90-236 Łódź, Poland

‡ Department of Quantum Chemistry, Faculty of Chemistry, Nicolaus Copernicus University in  
Toruń, 7 Gagarina St., 87-100 Toruń, Poland

e-mail: marcinp@uni.lodz.pl

## SUPPLEMENTARY INFORMATION

**Table S.1.** Statistic of d(NO) bond lengths [ $\text{\AA}$ ] on the base of CSD searches.

| acyclic imine <i>N</i> -oxides (type <b>A</b> )  |                                                                                     | all data     | room T data  | low T data   |
|--------------------------------------------------|-------------------------------------------------------------------------------------|--------------|--------------|--------------|
| minimum                                          | 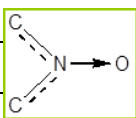   | 1.261        | 1.261        | 1.277        |
| maximum                                          |                                                                                     | 1.368        | 1.344        | 1.368        |
| <b>mean</b>                                      |                                                                                     | <b>1.301</b> | <b>1.298</b> | <b>1.304</b> |
| median                                           |                                                                                     | 1.296        | 1.295        | 1.298        |
| mean SE                                          |                                                                                     | 0.019        | 0.018        | 0.019        |
| observations                                     |                                                                                     | 76           | 42           | 34           |
| aromatic imine <i>N</i> -oxides (type <b>B</b> ) |                                                                                     |              |              |              |
| minimum                                          |    | 1.275        | 1.275        | 1.277        |
| maximum                                          |                                                                                     | 1.371        | 1.371        | 1.358        |
| <b>mean</b>                                      |                                                                                     | <b>1.318</b> | <b>1.318</b> | <b>1.314</b> |
| median                                           |                                                                                     | 1.317        | 1.317        | 1.313        |
| mean SE                                          |                                                                                     | 0.017        | 0.017        | 0.016        |
| observations                                     |                                                                                     | 545          | 355          | 190          |
| aromatic <i>N</i> -oxides (type <b>C</b> )       |                                                                                     |              |              |              |
| minimum                                          |  | 1.248        | 1.248        | 1.269        |
| maximum                                          |                                                                                     | 1.375        | 1.360        | 1.375        |
| <b>mean</b>                                      |                                                                                     | <b>1.300</b> | <b>1.289</b> | <b>1.322</b> |
| median                                           |                                                                                     | 1.284        | 1.280        | 1.344        |
| mean SE                                          |                                                                                     | 0.033        | 0.025        | 0.040        |
| observations                                     |                                                                                     | 39           | 29           | 10           |
| aliphatic <i>N</i> -oxides (type <b>D</b> )      |                                                                                     |              |              |              |
| minimum                                          |  | 1.387        | 1.359        | 1.381        |
| maximum                                          |                                                                                     | 1.438        | 1.438        | 1.401        |
| <b>mean</b>                                      |                                                                                     | <b>1.394</b> | <b>1.397</b> | <b>1.393</b> |
| median                                           |                                                                                     | 1.395        | 1.400        | 1.393        |
| mean SE                                          |                                                                                     | 0.010        | 0.015        | 0.004        |
| observations                                     |                                                                                     | 48           | 19           | 29           |
| hydroxyamines (single N-O bond; type <b>E</b> )  |                                                                                     |              |              |              |
| minimum                                          |  | 1.408        | 1.408        | 1.426        |
| maximum                                          |                                                                                     | 1.468        | 1.468        | 1.468        |
| <b>mean</b>                                      |                                                                                     | <b>1.447</b> | <b>1.447</b> | <b>1.448</b> |

Supplementary Information File for PCCP

|                                                  |                                                                                   |              |              |              |
|--------------------------------------------------|-----------------------------------------------------------------------------------|--------------|--------------|--------------|
| median                                           |                                                                                   | 1.450        | 1.450        | 1.450        |
| mean SE                                          |                                                                                   | 0.011        | 0.013        | 0.009        |
| observations                                     |                                                                                   | 86           | 51           | 35           |
| nitrosoalkanes (double N=O bond; type <b>F</b> ) |                                                                                   |              |              |              |
| minimum                                          |                                                                                   | 1.213        | 1.213        | 1.234        |
| maximum                                          | 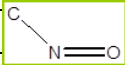 | 1.326        | 1.301        | 1.326        |
| <b>mean</b>                                      |                                                                                   | <b>1.272</b> | <b>1.261</b> | <b>1.276</b> |
| median                                           |                                                                                   | 1.275        | 1.258        | 1.279        |
| mean SE                                          |                                                                                   | 0.022        | 0.022        | 0.021        |
| observations                                     |                                                                                   | 59           | 18           | 41           |

**Table S 2.** Geometric parameters of *N*-oxide halogen bonds obtained from CSD searches.

| CSD refcode           | d(NO) [Å]    | d(O...X)[Å]  | <(NO...X)[°] | <(O...XC)[°] | <i>N</i> -oxide type |
|-----------------------|--------------|--------------|--------------|--------------|----------------------|
| <b>N-&gt;O...Cl-C</b> |              |              |              |              |                      |
| CECZUF                | 1.292        | 3.182        | 164.9        | 141.6        | <b>B</b>             |
| KACGEA                | 1.394        | 3.233        | 147.5        | 178.9        | <b>D</b>             |
| <b>N-&gt;O...Br-C</b> |              |              |              |              |                      |
| SILNIL                | 1.291        | 3.178        | 166.3        | 170.9        | <b>A</b>             |
| TAKBAJ                | 1.320        | 3.156        | 119.4        | 164.8        | <b>A</b>             |
| XIMVAR                | 1.324        | 3.029        | 127.9        | 158.2        | <b>B</b>             |
| YOFXEX                | 1.292        | 2.820        | 156.9        | 165.5        | <b>B</b>             |
| <b>N-&gt;O...I-C</b>  |              |              |              |              |                      |
| COJJOB                | 1.307        | 2.823        | 149.5        | 173.9        | <b>B</b>             |
| EVIKOJ                | 1.335        | 2.848        | 116.1        | 169.4        | <b>B</b>             |
| EVIKOJ                | 1.328        | 3.264        | 114.8        | 175.7        | <b>B</b>             |
| OCOMUO                | 1.307        | 2.754        | 143.8        | 170.3        | <b>B</b>             |
| OCOMUO01              | 1.302        | 2.753        | 143.7        | 170.2        | <b>B</b>             |
| OCOMUO02              | 1.302        | 2.736        | 143.4        | 170.0        | <b>B</b>             |
| OCOMUO03              | 1.306        | 2.728        | 143.2        | 169.9        | <b>B</b>             |
| OCOMUO04              | 1.304        | 2.722        | 143.1        | 169.8        | <b>B</b>             |
| OCOMUO05              | 1.301        | 2.725        | 143.4        | 169.8        | <b>B</b>             |
| XIHCOG                | 1.291        | 2.988        | 104.1        | 162.9        | <b>B</b>             |
| IHUNAB                | 1.266        | 2.944        | 114.2        | 163.8        | <b>C</b>             |
| minimum               | 1.270        | 2.72         | 104.1        | 141.6        |                      |
| maximum               | 1.340        | 3.26         | 166.3        | 175.7        |                      |
| <b>mean</b>           | <b>1.304</b> | <b>2.916</b> | <b>137.2</b> | <b>166.7</b> |                      |
| median                | 1.300        | 2.84         | 143.3        | 169.8        |                      |
| mean SE               | 0.016        | 0.186        | 18.3         | 7.7          |                      |
